# Supplementary material
Source: Springer Nature journal article supplement (https://www.springermedizin.de/resource/supplementary/13012_2008_109_MOESM5_ESM.pdf/9629264)
Supplement: MOESM5 [file 9629264]

Potential relevant articles  
screened  
(N = 148)

Excluded articles (N = 24)

- Not health professionals (N = 3)
- Text not in English (N = 4)
- Complete text not available (N = 7)
- Literature Review (N = 4)
- No test of theory (N = 4)
- Explicative text of theory (N = 1)

Articles retained for  
detailed evaluation  
(N = 124)

Excluded articles (N = 48)

- Use a cross-sectional design to predict behaviour (N = 16)
- Not reported the needed statistics (N = 14)
- No clear reference of the theory used (N = 5)
- Using students samples (N = 9)
- Inappropriate measures of theoretical constructs (N = 3)
- Measurement of willingness instead of intention (N = 1)
- The reported model was based on the same sample used in another publication (N = 1)

Articles included in the  
review (N = 76)
